# Supplementary material
Source: PubMed Central journal article supplement (PMC3158685)
Supplement: supp_mcr166_mcr166supp.pdf [file supp_mcr166_mcr166supp.pdf]

## SUPPLEMENTARY DATA

TABLE S1. Synthetic canopy file used to model understorey light interception and carbon gain in YPLANT, derived by averaging information from hemispherical photos taken above individual plants throughout the stand. The file consists of an array describing canopy openness by azimuth classes (columns) and angular elevation (rows), followed by the time sequence of sunflecks (direct light) occurring beneath that particular canopy, on a particular day (the summer solstice in this case).

|        | INDIRECT SITE FACTOR |         |         |         |         |         |         |         | TOTALS  |
|--------|----------------------|---------|---------|---------|---------|---------|---------|---------|---------|
|        | N                    | NE      | E       | SE      | S       | SW      | W       | NW      |         |
| 86-90  | 0.00046              | 0.00046 | 0.00046 | 0.00046 | 0.00046 | 0.00046 | 0.00046 | 0.00046 | 0.00366 |
| 81-86  | 0.00040              | 0.00040 | 0.00040 | 0.00040 | 0.00040 | 0.00040 | 0.00040 | 0.00040 | 0.00323 |
| 77-81  | 0.00038              | 0.00038 | 0.00038 | 0.00038 | 0.00038 | 0.00038 | 0.00038 | 0.00038 | 0.00303 |
| 72-77  | 0.00035              | 0.00035 | 0.00035 | 0.00035 | 0.00035 | 0.00035 | 0.00035 | 0.00035 | 0.00283 |
| 68-72  | 0.00038              | 0.00038 | 0.00038 | 0.00038 | 0.00038 | 0.00038 | 0.00038 | 0.00038 | 0.00303 |
| 63-68  | 0.00035              | 0.00035 | 0.00035 | 0.00035 | 0.00035 | 0.00035 | 0.00035 | 0.00035 | 0.00279 |
| 59-63  | 0.00031              | 0.00031 | 0.00031 | 0.00031 | 0.00031 | 0.00031 | 0.00031 | 0.00031 | 0.00249 |
| 54-59  | 0.00031              | 0.00031 | 0.00031 | 0.00031 | 0.00031 | 0.00031 | 0.00031 | 0.00031 | 0.00245 |
| 50-54  | 0.00032              | 0.00032 | 0.00032 | 0.00032 | 0.00032 | 0.00032 | 0.00032 | 0.00032 | 0.00255 |
| 45-50  | 0.00025              | 0.00025 | 0.00025 | 0.00025 | 0.00025 | 0.00025 | 0.00025 | 0.00025 | 0.00197 |
| 41-45  | 0.00026              | 0.00026 | 0.00026 | 0.00026 | 0.00026 | 0.00026 | 0.00026 | 0.00026 | 0.00204 |
| 36-41  | 0.00023              | 0.00023 | 0.00023 | 0.00023 | 0.00023 | 0.00023 | 0.00023 | 0.00023 | 0.00184 |
| 32-36  | 0.00024              | 0.00024 | 0.00024 | 0.00024 | 0.00024 | 0.00024 | 0.00024 | 0.00024 | 0.00191 |
| 27-32  | 0.00022              | 0.00022 | 0.00022 | 0.00022 | 0.00022 | 0.00022 | 0.00022 | 0.00022 | 0.00174 |
| 23-27  | 0.00020              | 0.00020 | 0.00020 | 0.00020 | 0.00020 | 0.00020 | 0.00020 | 0.00020 | 0.00161 |
| 18-23  | 0.00016              | 0.00016 | 0.00016 | 0.00016 | 0.00016 | 0.00016 | 0.00016 | 0.00016 | 0.00130 |
| 14-18  | 0.00010              | 0.00010 | 0.00010 | 0.00010 | 0.00010 | 0.00010 | 0.00010 | 0.00010 | 0.00081 |
| 9-14   | 0.00008              | 0.00008 | 0.00008 | 0.00008 | 0.00008 | 0.00008 | 0.00008 | 0.00008 | 0.00067 |
| 5-9    | 0.00000              | 0.00000 | 0.00000 | 0.00000 | 0.00000 | 0.00000 | 0.00000 | 0.00000 | 0.00002 |
| 0-5    | 0.00000              | 0.00000 | 0.00000 | 0.00000 | 0.00000 | 0.00000 | 0.00000 | 0.00000 | 0.00001 |
| TOTALS | 0.00500              | 0.00500 | 0.00500 | 0.00500 | 0.00500 | 0.00500 | 0.00500 | 0.00500 | 0.04000 |

### PHOTO #1, DIRECT SUNLIGHT FOR DAY 355

| start | end   |
|-------|-------|
| 6.53  | 6.54  |
| 6.94  | 6.95  |
| 7.34  | 7.35  |
| 7.73  | 7.75  |
| 8.13  | 8.14  |
| 8.52  | 8.54  |
| 8.92  | 8.93  |
| 9.32  | 9.34  |
| 9.74  | 9.76  |
| 10.17 | 10.19 |
| 10.65 | 10.68 |
| 11.34 | 11.39 |
| 11.99 | 12.01 |
| 12.61 | 12.66 |
| 13.32 | 13.35 |
| 13.81 | 13.83 |
| 14.24 | 14.26 |
| 14.66 | 14.68 |
| 15.07 | 15.08 |
| 15.46 | 15.48 |
| 15.86 | 15.87 |
| 16.25 | 16.27 |
| 16.65 | 16.66 |
| 17.05 | 17.06 |
| 17.46 | 17.47 |

TABLE S2. Leaf respiration rates on an area basis ( $\mu\text{mol m}^{-2} \text{s}^{-1}$ ) of sapling evergreens measured on three nights (2230–0130 hrs) and three days (1030–1330 hrs) in December 2008, in the understory of a second-growth stand in Parque Nacional Puyehue. Data show means and standard errors of measurements on five replicate individuals of each species during each period, plus measurement temperatures.

|                     | Night 1      | Day 1        | Night 2      | Day 2        | Night 3      | Day 3        |
|---------------------|--------------|--------------|--------------|--------------|--------------|--------------|
| <i>Aristotelia</i>  | -0.48 ± 0.04 | -0.40 ± 0.12 | -0.31 ± 0.08 | -0.37 ± 0.06 | -0.25 ± 0.06 | -0.21 ± 0.12 |
| <i>Nothofagus</i>   | -0.43 ± 0.04 | -0.52 ± 0.06 | -0.46 ± 0.06 | -0.35 ± 0.04 | -0.25 ± 0.03 | -0.35 ± 0.06 |
| <i>Eucryphia</i>    | -0.43 ± 0.15 | -0.40 ± 0.03 | -0.28 ± 0.03 | -0.21 ± 0.03 | -0.20 ± 0.04 | -0.25 ± 0.04 |
| <i>Amomyrtus</i>    | -0.44 ± 0.05 | -0.44 ± 0.02 | -0.27 ± 0.06 | -0.26 ± 0.02 | -0.24 ± 0.07 | -0.18 ± 0.04 |
| <i>Laureliopsis</i> | -0.53 ± 0.04 | -0.53 ± 0.04 | -0.22 ± 0.04 | -0.22 ± 0.05 | -0.21 ± 0.07 | -0.31 ± 0.08 |
| <i>Aextoxicon</i>   | -0.30 ± 0.04 | -0.24 ± 0.05 | -0.20 ± 0.00 | -0.17 ± 0.02 | -0.14 ± 0.02 | -0.22 ± 0.03 |
| <i>Myrceugenia</i>  | -0.45 ± 0.07 | -0.32 ± 0.04 | -0.21 ± 0.03 | -0.26 ± 0.05 | -0.24 ± 0.07 | -0.36 ± 0.08 |
| Temperature (°C)    | 18.1 ± 0.1   | 20.1 ± 0.1   | 11.2 ± 0.1   | 20.3 ± 0.2   | 16.5 ± 0.1   | 20.1 ± 0.1   |

TABLE S3. Statistics of regressions of biomass allocation, crown architecture and carbon gain parameters on (log) seedling height.

|                                 | <i>Aristotelia</i> |        | <i>Nothofagus</i> |        | <i>Eucryphia</i> |        | <i>Amomyrtus</i> |        | <i>Laureliopsis</i> |        | <i>Aextoxicon</i> |        | <i>Myrceugenia</i> |        |
|---------------------------------|--------------------|--------|-------------------|--------|------------------|--------|------------------|--------|---------------------|--------|-------------------|--------|--------------------|--------|
|                                 | $R^2$              | $P$    | $R^2$             | $P$    | $R^2$            | $P$    | $R^2$            | $P$    | $R^2$               | $P$    | $R^2$             | $P$    | $R^2$              | $P$    |
| (log) Specific leaf area        | 0.347              | 0.005  | 0.206             | 0.02   | 0.681            | <0.001 | 0.586            | <0.001 | 0.25                | 0.021  | 0.483             | <0.001 | 0.494              | <0.001 |
| Leaf mass fraction              | 0.683              | <0.001 | 0.343             | 0.002  | 0.029            | 0.46   | <0.001           | 0.943  | 0.232               | 0.027  | 0.495             | <0.001 | 0.011              | 0.621  |
| (log) Leaf area ratio ( $LAR$ ) | 0.712              | <0.001 | 0.522             | <0.001 | 0.691            | <0.001 | 0.516            | <0.001 | 0.001               | 0.869  | 0.035             | 0.378  | 0.28               | 0.008  |
| Mean weighted angle             | 0.031              | 0.442  | 0.058             | 0.237  | 0.007            | 0.711  | 0.203            | 0.046  | 0.042               | 0.371  | 0.226             | 0.019  | 0.089              | 0.156  |
| Self-shaded fraction            | 0.255              | 0.02   | 0.464             | <0.001 | 0.416            | 0.002  | 0.118            | 0.139  | 0.677               | <0.001 | 0.584             | <0.001 | 0.328              | 0.003  |
| Silhouette-to-area ratio        | 0.036              | 0.412  | 0.431             | <0.001 | 0.403            | 0.002  | 0.054            | 0.323  | 0.538               | <0.001 | 0.765             | <0.001 | 0.417              | 0.001  |
| (log) $LAR_d$                   | 0.714              | <0.001 | 0.555             | <0.001 | 0.72             | <0.001 | 0.609            | <0.001 | 0.096               | 0.171  | 0.43              | 0.001  | 0.513              | <0.001 |
| Net C gain, sunny               | 0.173              | 0.06   | 0.622             | <0.001 | 0.472            | 0.001  | 0.014            | 0.62   | 0.658               | <0.001 | 0.831             | <0.001 | 0.622              | <0.001 |
| Net C gain, overcast            | 0.136              | 0.1    | 0.585             | <0.001 | 0.461            | 0.001  | 0.078            | 0.232  | 0.608               | <0.001 | 0.78              | <0.001 | 0.651              | <0.001 |
| Weighted net C gain             | 0.183              | 0.053  | 0.703             | <0.001 | 0.512            | <0.001 | 0.065            | 0.279  | 0.76                | <0.001 | 0.861             | <0.001 | 0.792              | <0.001 |
